# Supplementary material
Source: PubMed Central journal article supplement (PMC3963001)
Supplement: supp_WNL.0000000000000219_Coinvestigators.pdf [file supp_WNL.0000000000000219_Coinvestigators.pdf]

## **CONTRIBUTORS**

### **Canadian Pediatric Genetic Disorders Sequencing Consortium (FORGE Canada):**

Kym Boycott MD, PhD, (University of Ottawa, Organizing Member); Jan Friedman MD PhD (University of British Columbia, Organizing Member); Bridget Fernandez MD (Memorial University, Organizing Member); Bartha Knoppers PhD (McGill University, Organizing Member); Mark Samuels PhD (Université de Montreal, Organizing Member); Jacques Michaud MD PhD (Université de Montreal, Organizing Member); Francois Bernier MD (University of Calgary, Organizing Member); Stephen Scherer PhD (University of Toronto, Organizing Member); Michael Brudno PhD (University of Toronto, Organizing Member); Janet Marcadier MSc (Children's Hospital of Eastern Ontario, Clinical Coordinator); Chandree Beaulieu MSc (Children's Hospital of Eastern Ontario, Clinical Coordinator)
