# Supplementary material
Source: PubMed Central journal article supplement (PMC3963001)
Supplement: supp_WNL.0000000000000219_Figure_e-2.pdf [file supp_WNL.0000000000000219_Figure_e-2.pdf]

**Supplementary Figure 2. DBP protein expression in patient fibroblasts**

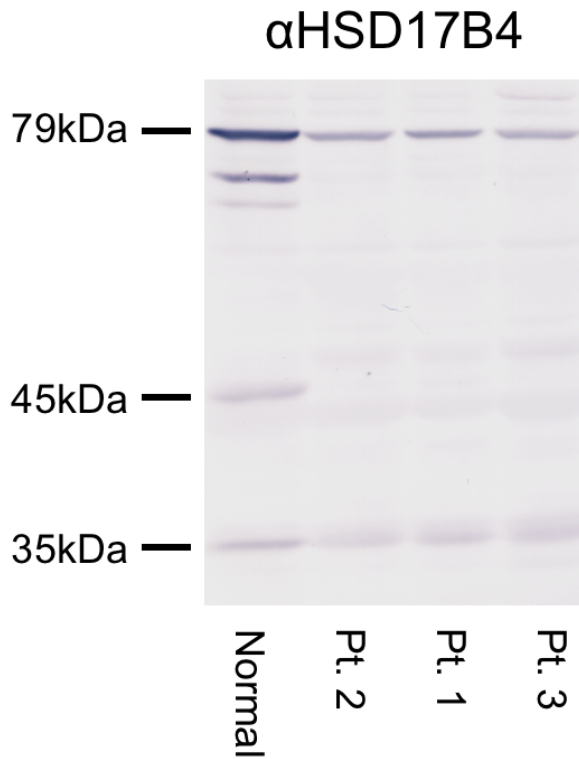

Whole-cell lysates from cultured skin fibroblasts were immunoblotted with a polyclonal antibody against HSD17B4/DBP. Expected bands include the unmodified full-length protein (79kDa) and posttranslationally modified cleavage products of 45kDa (hydratase domain) and 35kDa (dehydrogenase domain).<sup>5</sup> Sample order is: Normal control; Patient 2, Patient 1, Patient 3. The 45kDa fragment (containing the hydratase domain) is absent in all patients.
